# Supplementary material for: The associations between oxidative balance score and serum Klotho level in the U.S. population aged 40–79 years
Source: PubMed Central journal article supplement — Sci Rep. 2024 Nov 21;14:28909. doi: 10.1038/s41598-024-80464-5 (PMC11582585; doi:10.1038/s41598-024-80464-5), 2024-11-21
Supplement: 41598_2024_80464_MOESM1_ESM.pdf [file 41598_2024_80464_MOESM1_ESM.pdf]

# **The associations between oxidative balance score and serum Klotho level in the U.S. population aged 40-79 years**

Kang Wang, Zhongbiao Jiang, Qin Zhou, Hanfen Tang

**Page 2: Supplementary Table 1.** MET scores of physical activities.

**Page 3: Supplementary Table 2.** Ingredients that make up the oxidative balance score.

**Page 4: Supplementary Table 3.** Association with serum klotho after exclusion of each one of 20 components from OBS by one at a time.

**Page 5: Supplementary Table 4.** Association between oxidative balance score and serum klotho levels using alternative models of adjustment.

**Page 6: Supplemental Table 5.** Association between oxidative balance score and serum klotho levels after retrieving participants with fewer missing items of OBS ( $\leq 5$  items).

**Supplementary Table 1. MET scores of physical activities.**

|                                       | MET score |                      |          |
|---------------------------------------|-----------|----------------------|----------|
|                                       | 0         | 4                    | 8        |
| Work activity <sup>+</sup>            | No        | Moderate             | Vigorous |
| Transportation modes                  | others    | Walking or bicycling |          |
| Recreational activities <sup>++</sup> | No        | Moderate             | Vigorous |

Abbreviations: MET, metabolic equivalent of task;

<sup>+</sup> including carrying or lifting loads, digging or construction work and so on;

<sup>++</sup> including bicycling, swimming, volleyball, running, basketball and so on.

**Supplementary Table 2. Ingredients that make up the oxidative balance score.**

| OBS components                       | Property | Male     |                 |          | Female  |                |          |
|--------------------------------------|----------|----------|-----------------|----------|---------|----------------|----------|
|                                      |          | 0        | 1               | 2        | 0       | 1              | 2        |
| <b>Dietary OBS components</b>        |          |          |                 |          |         |                |          |
| Dietary fiber (g/d)                  | A        | <14.10   | 14.10-22.10     | ≥22.10   | <12.10  | 12.10-18.25    | ≥18.25   |
| Carotene (RE/d)                      | A        | <61.49   | 61.49-203.32    | ≥203.32  | <69.31  | 69.31-229.75   | ≥229.75  |
| Riboflavin (mg/d)                    | A        | <1.79    | 1.79-2.58       | ≥2.58    | <1.42   | 1.42-2.01      | ≥2.01    |
| Niacin (mg/d)                        | A        | <22.28   | 22.28-31.45     | ≥31.45   | <16.10  | 16.10-22.83    | ≥22.83   |
| Vitamin B6 (mg/d)                    | A        | <1.76    | 1.76-2.54       | ≥2.54    | <1.32   | 1.32-1.92      | ≥1.92    |
| Total folate (mcg/d)                 | A        | <330.83  | 330.83-498.00   | ≥498.00  | <264.00 | 264.00-385.17  | ≥385.17  |
| Vitamin B12 (mcg/d)                  | A        | <3.57    | 3.57-6.08       | ≥6.08    | <2.62   | 2.62-4.36      | ≥4.36    |
| Vitamin C (mg/d)                     | A        | <45.33   | 45.33-103.22    | ≥103.22  | <44.90  | 44.90-99.05    | ≥99.05   |
| Vitamin E (ATE) (mg/d)               | A        | <6.15    | 6.15-9.63       | ≥9.63    | <5.15   | 5.15-8.17      | ≥8.17    |
| Calcium (mg/d)                       | A        | <732.83  | 732.83-1091.50  | ≥1091.50 | <616.00 | 616.00-921.83  | ≥921.83  |
| Magnesium (mg/d)                     | A        | <266.50  | 266.50-369.50   | ≥369.50  | <218.83 | 218.83-301.00  | ≥301.00  |
| Zinc (mg/d)                          | A        | <9.75    | 9.75-14.12      | ≥14.12   | <7.37   | 7.37-10.35     | ≥10.35   |
| Copper (mg/d)                        | A        | <1.07    | 1.07-1.52       | ≥1.52    | <0.90   | 0.90-1.26      | ≥1.26    |
| Selenium (mcg/d)                     | A        | <101.30  | 101.30-141.10   | ≥141.10  | <74.13  | 74.13-105.05   | ≥105.05  |
| Total fat (g/d)                      | P        | ≥98.84   | 66.72-98.84     | <66.72   | ≥73.80  | 50.24-73.80    | <50.24   |
| Iron (mg/d)                          | P        | ≥18.15   | 12.64-18.15     | <12.64   | ≥14.01  | 9.76-14.01     | <9.76    |
| <b>Lifestyle OBS components</b>      |          |          |                 |          |         |                |          |
| Physical activity (MET-minute/wk)    | A        | <1200.00 | 1200.00-4453.00 | ≥4453.00 | <800.00 | 800.00-2520.00 | ≥2520.00 |
| Alcohol (g/d)                        | P        | ≥4.00    | 2.00-4.00       | <2.00    | ≥2.00   | 1.00-2.00      | <1.00    |
| Body mass index (kg/m <sup>2</sup> ) | P        | ≥30.39   | 26.40-30.39     | <26.40   | ≥31.60  | 25.80-31.60    | <25.80   |
| Cotinine (ng/ml)                     | P        | ≥0.23    | 0.02-0.23       | <0.02    | ≥0.06   | 0.01-0.06      | <0.01    |

A stood for the antioxidant, P for the pro-oxidant, RE for the retinal equivalent, ATE for the alpha-tocopherol equivalent, and MET for the metabolic equivalent.

**Supplementary Table 3. Association with serum klotho after exclusion of each one of 20 components from OBS by one at a time.**

|                             | Tertiles of OBS |                      |                     | Continuous (per 1 score increase) |
|-----------------------------|-----------------|----------------------|---------------------|-----------------------------------|
|                             | T1              | T2                   | T3                  |                                   |
| OBS excluding dietary fiber | ref             | 18.84(-2.70, 40.38)  | 31.05(5.52, 56.58)  | 2.95(1.02, 4.88)                  |
| OBS excluding carotene      | ref             | 17.09(-2.43, 36.61)  | 32.61(6.51, 58.70)  | 2.92(1.00, 4.83)                  |
| OBS excluding riboflavin    | ref             | 20.96(0.12, 41.81)   | 42.72(14.95, 70.49) | 3.11(1.17, 5.06)                  |
| OBS excluding niacin        | ref             | 16.22(-4.47, 36.90)  | 36.58(9.05, 64.11)  | 3.10(1.15, 5.04)                  |
| OBS excluding vitamin b6    | ref             | 21.35(1.47, 41.23)   | 38.66(11.24, 66.07) | 3.23(1.26, 5.19)                  |
| OBS excluding total folate  | ref             | 17.61(-3.02, 38.24)  | 31.23(3.67, 58.79)  | 3.14(1.18, 5.10)                  |
| OBS excluding vitamin b12   | ref             | 20.73(1.22, 40.24)   | 39.80(12.59, 67.00) | 3.20(1.29, 5.11)                  |
| OBS excluding vitamin c     | ref             | 17.58(-1.09, 36.24)  | 23.94(2.93, 50.81)  | 3.00(1.08, 4.92)                  |
| OBS excluding vitamin e     | ref             | 24.19(2.74, 45.64)   | 35.32(7.94, 62.71)  | 3.27(1.30, 5.24)                  |
| OBS excluding calcium       | ref             | 14.45(-6.21, 35.12)  | 31.90(5.69, 58.10)  | 2.92(0.99, 4.86)                  |
| OBS excluding magnesium     | ref             | 21.64(-0.11, 43.39)  | 40.19(11.90, 68.48) | 3.38(1.39, 5.36)                  |
| OBS excluding zinc          | ref             | 20.43(-0.11, 40.97)  | 36.08(7.79, 64.37)  | 3.07(1.11, 5.04)                  |
| OBS excluding copper        | ref             | 19.20(-1.22, 39.62)  | 32.29(6.72, 57.87)  | 3.14(1.21, 5.08)                  |
| OBS excluding selenium      | ref             | 23.64(2.13, 45.15)   | 38.21(10.44, 65.99) | 3.05(1.17, 4.94)                  |
| OBS excluding total fat     | ref             | 10.57(-10.44, 31.58) | 29.95(1.90, 58.00)  | 2.69(0.92, 4.47)                  |
| OBS excluding iron          | ref             | 15.00(-5.22, 35.22)  | 37.25(8.10, 66.39)  | 2.79(1.06, 4.52)                  |
| OBS excluding PA            | ref             | 19.33(-0.94, 39.59)  | 40.10(13.29, 66.92) | 2.93(1.03, 4.83)                  |
| OBS excluding alcohol       | ref             | 3.92(-18.80, 26.65)  | 23.76(4.50, 52.02)  | 2.12(0.30, 3.95)                  |
| OBS excluding BMI           | ref             | 14.94(-6.42, 36.29)  | 29.93(2.99, 56.86)  | 2.51(0.68, 4.34)                  |
| OBS excluding cotinine      | ref             | 18.23(-1.98, 38.44)  | 29.32(2.28, 56.36)  | 2.74(0.80, 4.68)                  |

The model adjusted for age (continuous, years) and sex (female and male), race (White, Black, Hispanic, Mexican American and others), marital status (cohabiting and single), education status (less than high school, high school and more than high school), and poverty income ratio (continuous), daily energy intake (continuous, kcal/d), whole grain (continuous, g/d), milk (continuous, cup/d), red meat (continuous, oz/d), cured meat (continuous, oz/d) and egg intake (continuous, oz/d).

Abbreviation: OBS, oxidative balance score; PA, physical activity; BMI, body mass index.

**Supplementary Table 4. Association between oxidative balance score and serum klotho levels using alternative models of adjustment.**

|                 | Tertiles of OBS |                     |                    | Continuous (per 1 score increase) |
|-----------------|-----------------|---------------------|--------------------|-----------------------------------|
|                 | T1              | T2                  | T3                 |                                   |
| <b>Model 3</b>  | reference       | 15.57(-5.75, 36.90) | 30.35(3.43, 57.28) | 2.85(1.03, 4.68)                  |
| <b>Model 3b</b> | reference       | 15.33(-5.92, 36.59) | 28.88(2.04, 55.71) | 2.74(0.93, 4.55)                  |
| <b>Model 3c</b> | reference       | 25.14(-0.68, 50.96) | 36.22(3.57, 68.87) | 3.54(1.32, 5.76)                  |
| <b>Model 3d</b> | reference       | 37.00(3.95, 70.04)  | 34.10(4.08, 68.69) | 3.31(1.02, 5.60)                  |

Model 3(original model) adjusted for age (continuous, years) and sex (female and male), race (White, Black, Hispanic, Mexican American and others), marital status (cohabiting and single), education status (less than high school, high school and more than high school), and poverty income ratio (continuous), daily energy intake (continuous, kcal/d), whole grain (continuous, g/d), milk (continuous, cup/d), red meat (continuous, oz/d), cured meat (continuous, oz/d) and egg intake (continuous, oz/d).

Model 3b: Model 3 + diabetes, hypertension and hyperlipidemia (yes or no).

Model 3c excluded participants with extreme energy intake (< 1000 and > 5000 kcal/d).

Model 3d excluded participants with chronic diseases (including diabetes and hypertension).

**Supplemental Table 5. Association between oxidative balance score and serum klotho levels after retrieving participants with fewer missing items of OBS ( $\leq 5$  items).**

|                                   | Tertiles of OBS |                     |                        | Continuous (per 0.1 score increase) |
|-----------------------------------|-----------------|---------------------|------------------------|-------------------------------------|
|                                   | T1              | T2                  | T3                     |                                     |
| <b>Participants</b>               | 4,086           | 3,732               | 3,789                  |                                     |
| <b><math>\beta</math> (95%CI)</b> |                 |                     |                        |                                     |
| <b>Model 1</b>                    | reference       | 3.59(-16.19, 23.37) | 24.33(3.12, 45.53)*    | 3.6( 1.15, 6.04)*                   |
| <b>Model 2</b>                    | reference       | 16.45(-7.64, 40.54) | 47.27(20.32, 74.21)*** | 7.48( 3.82,11.14)***                |
| <b>Model 3</b>                    | reference       | 8.34(-16.27,32.94)  | 29.55( 0.53,58.57)*    | 5.23( 1.23, 9.22)*                  |

In this analysis, we retrieved participants with fewer missing items of OBS ( $\leq 5$  items). Participants with 1-5 missing items of OBS were retrieved by adjusting the number of items in OBS calculations. For example, if a participant had 5 missing items of OBS, His OBS was calculated by the sum of all item scores divided by 15.

Model 1: age (continuous, years) and sex (female and male).

Model 2: Model 1 + race (White, Black, Hispanic, Mexican American and others), marital status (cohabiting and single), education status (less than high school, high school and more than high school), poverty income ratio (continuous) and daily energy intake (continuous, kcal/d).

Model 3: Model 2 + whole grain (continuous, g/d), milk (continuous, cup/d), red meat (continuous, oz/d), cured meat (continuous, oz/d) and egg intake (continuous, oz/d).

Abbreviations: OBS, oxidative balance score; CI, confidence interval.

\* $P < 0.05$ ; \*\* $P < 0.01$ ; \*\*\* $P < 0.001$ .
